# Supplementary material for: Targeted activation of melanoma differentiation-associated protein 5 (MDA5) for immunotherapy of pancreatic carcinoma
Source: PubMed Central journal article supplement — Oncoimmunology. 2015 Apr 14;4(10):e1029698. doi: 10.1080/2162402X.2015.1029698 (PMC4589065; doi:10.1080/2162402x.2015.1029698), 2015-04-14
Supplement: koni-04-10-1029698-s001.pdf [file koni-04-10-1029698-s001.pdf]

Figure S1

A

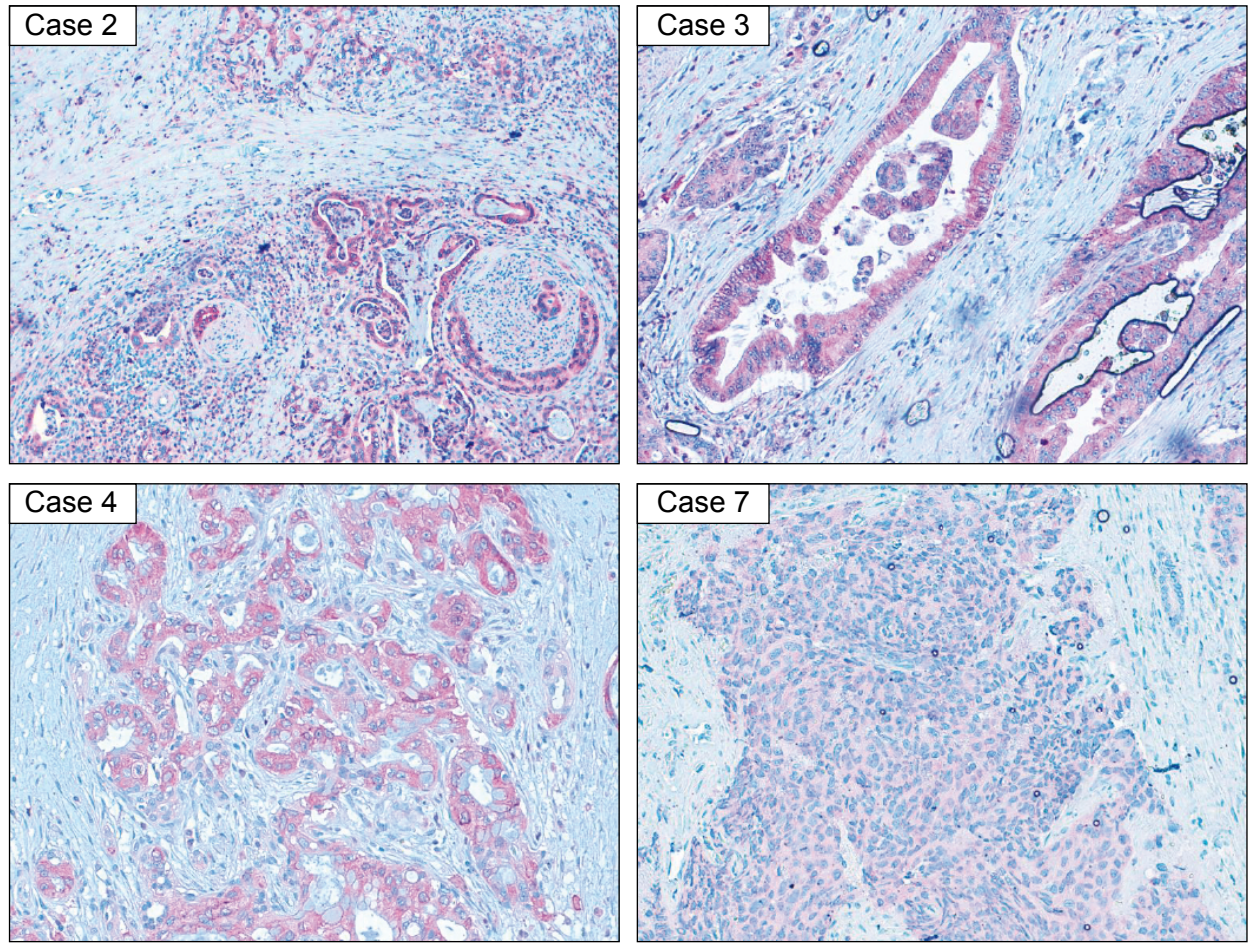

B

| Case | Sex | Age | Histology | Grading | Primary/Met | MDA5 Score |
|------|-----|-----|-----------|---------|-------------|------------|
| 1    | m   | 61  | Adeno     | 2       | P           | 3          |
| 2    | w   | 63  | Adeno     | 2       | P           | 3          |
| 3    | m   | 41  | Adeno     | 2       | P           | 3          |
| 4    | w   | 64  | Adeno     | 2       | P           | 3          |
| 5    | w   | 70  | Adeno     | 3       | P           | 2          |
| 6    | m   | 64  | Acinar    | 3       | P           | 1          |
| 7    | m   | 56  | Solid     | 4       | M           | 1          |
