# Supplementary figures and images for: Targeted activation of melanoma differentiation-associated protein 5 (MDA5) for immunotherapy of pancreatic carcinoma
Source: PubMed Central journal article supplement — Oncoimmunology. 2015 Apr 14;4(10):e1029698. doi: 10.1080/2162402X.2015.1029698 (PMC4589065; doi:10.1080/2162402x.2015.1029698), 2015-04-14

Figure S2

Center

Periphery

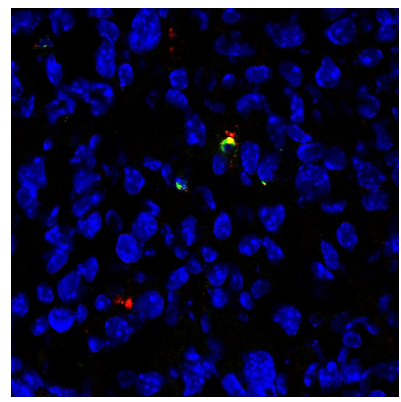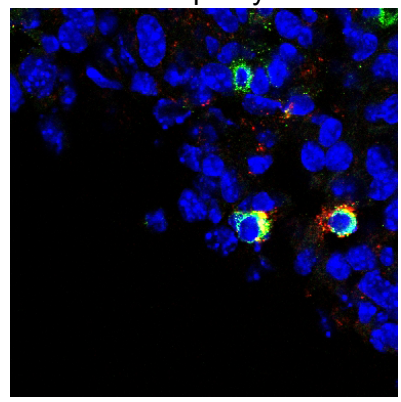

PBS

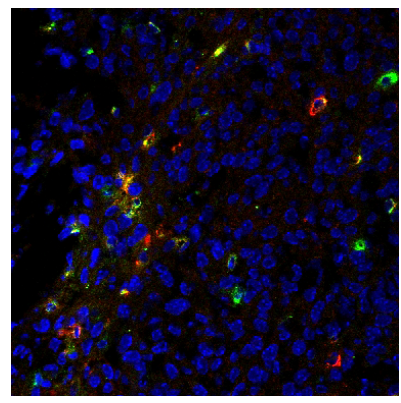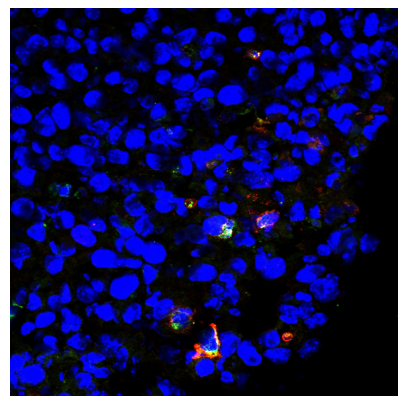

poly(I:C)

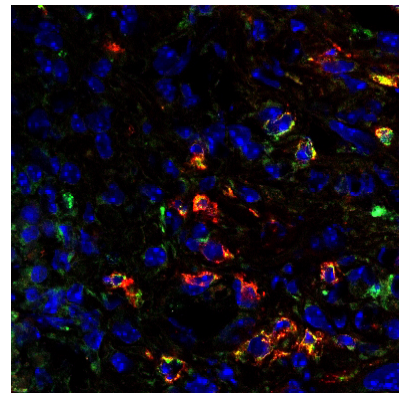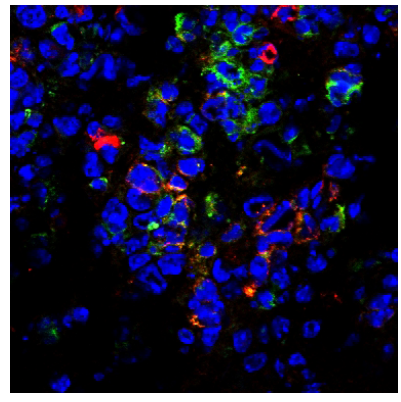

poly(I:C)-PEI

CD3 CD8 DAPI

Supplement: koni-04-10-1029698-s002.pdf [file koni-04-10-1029698-s002.pdf]
